# Supplementary material
Source: Springer Nature journal article supplement (https://www.springermedizin.de/resource/supplementary/12971_2010_96_MOESM3_ESM.pdf/9595394)

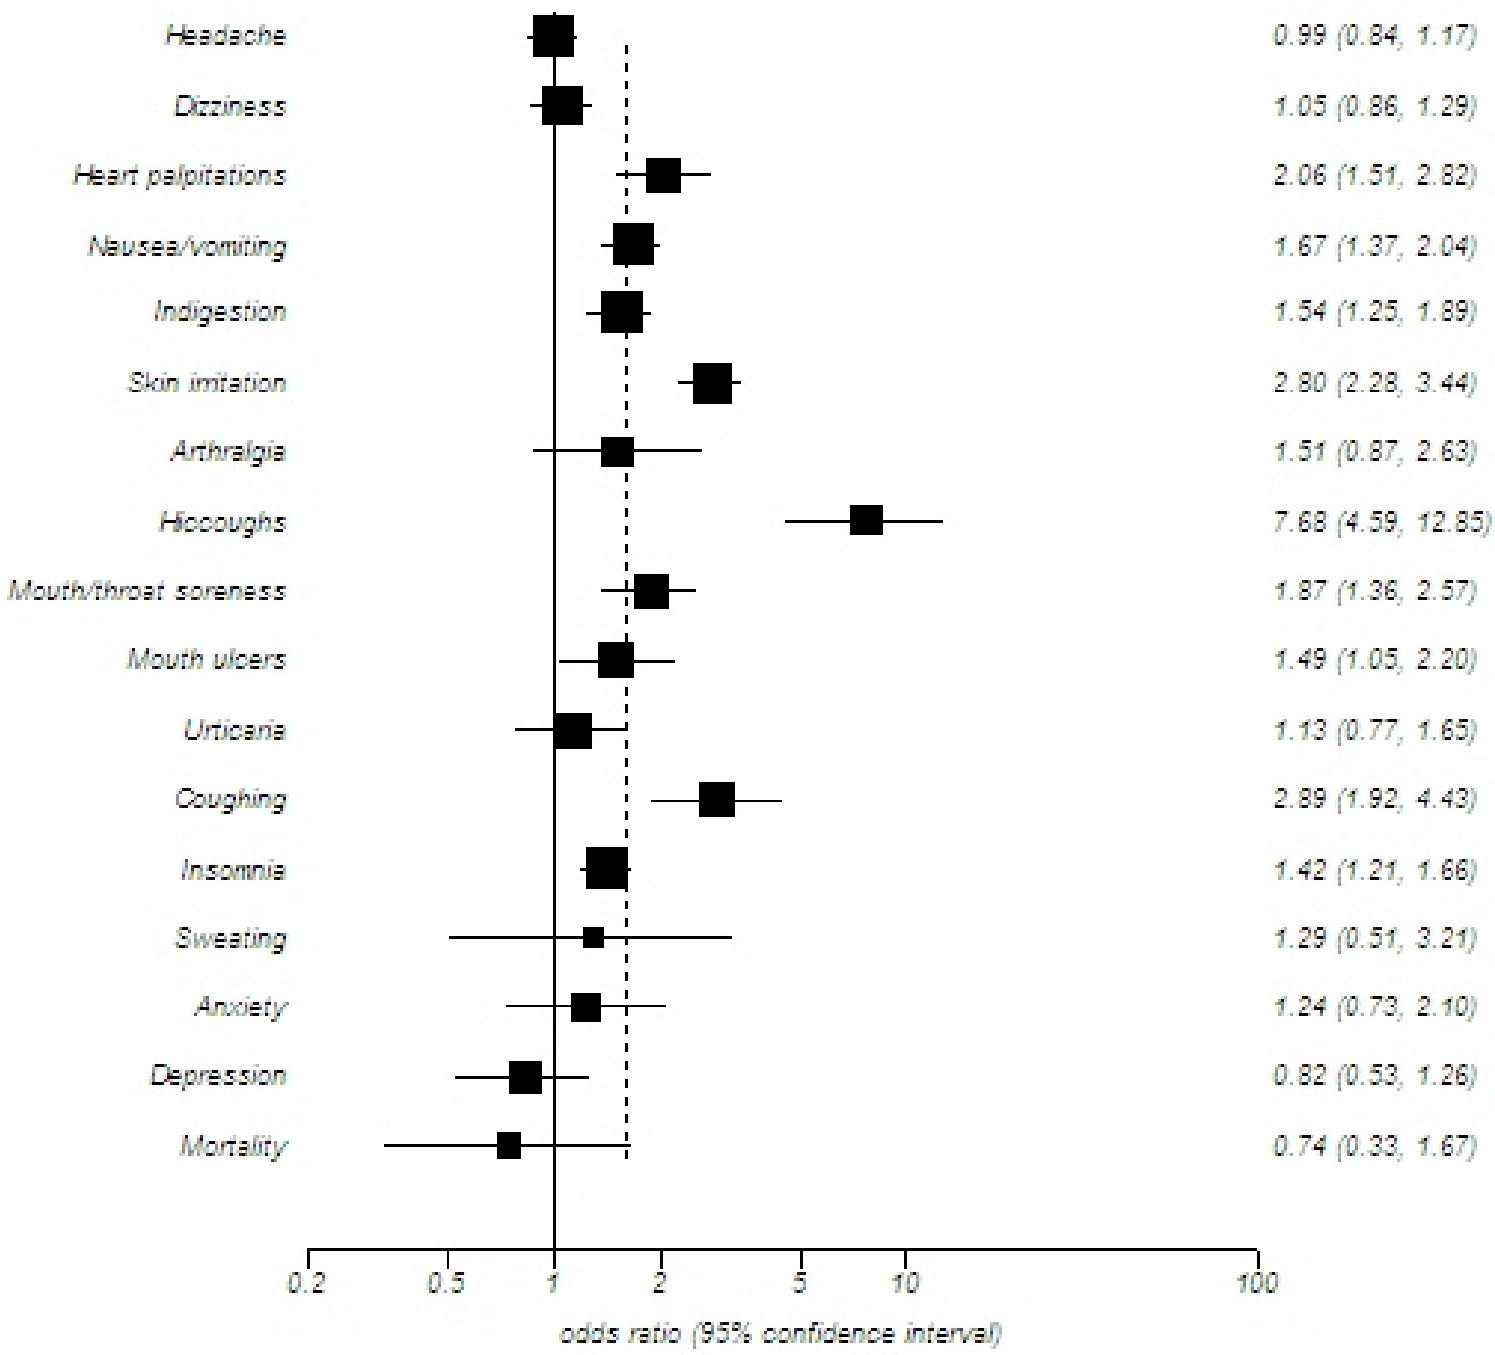

Supplement: MOESM3 [file 9595394]
